# Supplementary material
Source: PubMed Central journal article supplement (PMC5005480)
Supplement: JCM.00730-16_zjm999095122so1.pdf [file JCM.00730-16_zjm999095122so1.pdf]

SUPPLEMENTAL - TABLE S1 Comparator PCR assays and FilmArray ME Panel Limits of Detection (LoD)

| Analyte             | Assay Target | Analytical Validation                                          |                                                               |                                              | Comparator Assay Enrolled CSF Samples |                    |                      |
|---------------------|--------------|----------------------------------------------------------------|---------------------------------------------------------------|----------------------------------------------|---------------------------------------|--------------------|----------------------|
|                     |              | Comparator LoD (TCID <sub>50</sub> /mL or CFU/mL) <sup>a</sup> | FilmArray LoD (TCID <sub>50</sub> /mL or CFU/mL) <sup>a</sup> | Median Comparator Assay Cq of Samples at LoD | Median of Cq Values                   | Range of Cq Values | Number of Detections |
| Viruses             |              |                                                                |                                                               |                                              |                                       |                    |                      |
| CMV                 | UL123        | 100                                                            | 100                                                           | 17.5                                         | 20.2                                  | 16.3 - 24.0        | 3                    |
|                     | UL54         | 100                                                            |                                                               | 17.1                                         | 19.7                                  | 15.5 - 23.1        | 3                    |
| EV                  | 5utr1        | 1 - 89 <sup>b</sup>                                            | 5 - 50 <sup>a</sup>                                           | 15.4 - 22.0 <sup>b</sup>                     | 17.4                                  | 7.1 - 26.7         | 46                   |
|                     | 5utr2        | 1 - 100 <sup>b</sup>                                           |                                                               | 19.5 - 26.5 <sup>b</sup>                     | 18.8                                  | 5.0 - 30.9         | 45                   |
| HSV-1               | UL30         | 100                                                            | 250                                                           | 29.2                                         | 20.9                                  | 19.6 - 22.1        | 2                    |
|                     | UL42         | 1,000                                                          |                                                               | 26.4                                         | 16.5                                  | 16.3- 16.8         | 2                    |
| HSV-2               | UL30         | 66                                                             | 50                                                            | 28.3                                         | 29.9                                  | 24.1 - 33.1        | 10                   |
|                     | UL42         | 66                                                             |                                                               | 19.8                                         | 21.6                                  | 15.0 - 25.8        | 10                   |
| HHV-6               | DR2          | 1,000 <sup>c</sup>                                             | 10,000                                                        | 19.1                                         | 19.5                                  | 14.4 - 25.1        | 21                   |
|                     | U31          | 1,000 <sup>c</sup>                                             |                                                               | 20.2                                         | 20.8                                  | 16.4 - 25.5        | 18                   |
| HPeV                | 5utr1        | 10                                                             | 500                                                           | 15.8                                         | 23.6                                  | 18.8 - 29.2        | 7                    |
|                     | 5utr2        | 10                                                             |                                                               | 19.8                                         | 18.1                                  | 7.7 - 23.9         | 9                    |
| VZV                 | ORF62        | 0.10                                                           | 0.10                                                          | 20.3                                         | 19.9                                  | 12.2 - 25.8        | 4                    |
|                     | ORF63        | 0.10                                                           |                                                               | 18.7                                         | 13.3                                  | 12.3 - 14.2        | 2                    |
| Yeast               |              |                                                                |                                                               |                                              |                                       |                    |                      |
| <i>Cryptococcus</i> | cCryp-ATP6   | 175 - 1,000 <sup>d</sup>                                       | 100                                                           | 24.4 - 24.5 <sup>d</sup>                     | 27.7                                  | -                  | 1                    |
|                     | cCryp-COX2   | 175 - 1,000 <sup>d</sup>                                       |                                                               | 19.0 - 23.5 <sup>d</sup>                     | 23.9                                  | -                  | 1                    |

<sup>a</sup> TCID<sub>50</sub>/mL were for viral targets and CFU/mL were for *Cryptococcus* target.

<sup>b</sup> Four Enterovirus groups (A, B, C, and D) were evaluated separately; the range of results is shown.

<sup>c</sup> Units are in copies/mL.

<sup>d</sup> Two *Cryptococcus* species (*C. neoformans* and *C. gattii*) were evaluated separately; the range of results is shown.

Abbreviations: TCID<sub>50</sub>/mL, tissue culture infective dose 50 percent/ mL; CFU/mL, colony forming units/mL; Cq, Quantification Cycle (analogous to Ct, Cycle Threshold)

SUPPLEMENTAL- TABLE S2 Discrepant Investigation for Samples with Discordant Results [FilmArray ME Panel (FA) versus Comparator Methods]

| Patient No. | Target                | Demographic Information: |                            | CSF Parameters  |                 |                |                      |                      |            | Discrepancy Investigation        |                                                          |                                                                                     | Final Resolution of FA Result <sup>d</sup> |
|-------------|-----------------------|--------------------------|----------------------------|-----------------|-----------------|----------------|----------------------|----------------------|------------|----------------------------------|----------------------------------------------------------|-------------------------------------------------------------------------------------|--------------------------------------------|
|             |                       | Age, Sex                 | Immune Status <sup>e</sup> | Glucose (mg/dL) | Protein (mg/dL) | CSF Appearance | RBC (cells/ $\mu$ L) | WBC (cells/ $\mu$ l) | Gram Stain | AAC given before LP <sup>b</sup> | Additional Analysis or Supplemental Testing <sup>a</sup> | Summary of Clinical Diagnosis from Medical Records (final diagnosis) <sup>c</sup> : |                                            |
|             | <b>False Positive</b> |                          |                            |                 |                 |                |                      |                      |            |                                  |                                                          |                                                                                     |                                            |
| 1           | <i>E. coli</i> K1     | 35-64 yr, F              | 0                          | 51              | 28              | Clear          | 4                    | 3                    | NOS        | none                             | 2 <sup>nd</sup> target PCR (neuC) = negative             | Non-infectious, CNS disease (Hyperviscosity syndrome, no infection)                 | FP                                         |
| 2           | <i>H. influenzae</i>  | 2-23 mo, M               | 0                          | 5               | 175             | Cloudy         | 19                   | 1255                 | GND C      | none                             | 2 <sup>nd</sup> target PCR (OMP P6) = positive           | Infectious, CNS disease (Meningitis, presumed Gram Negative)                        | TP                                         |
| 3           | <i>S. agalactiae</i>  | +65 yr, M                | 0                          | 72              | 21              | Clear          | 81                   | 1                    | NOS        | VAN, TZP                         | 2 <sup>nd</sup> target PCR (cfb) = negative              | Infectious, non-CNS (Sepsis)                                                        | FP                                         |

|   |                      |             |   |    |     |               |      |      |     |                         |                                                                                                                                                                                                               |                                                                                     |    |
|---|----------------------|-------------|---|----|-----|---------------|------|------|-----|-------------------------|---------------------------------------------------------------------------------------------------------------------------------------------------------------------------------------------------------------|-------------------------------------------------------------------------------------|----|
|   |                      |             |   |    |     |               |      |      |     |                         | HSV-2 also detected by FA(TP) and SOC testing                                                                                                                                                                 | secondary to prostatitis, negative blood cultures)                                  |    |
| 4 | <i>S. pneumoniae</i> | 2-23 mo, M  | 0 | 32 | 157 | Clear         | 0    | 101  | NOS | none                    | 2 <sup>nd</sup> target PCR ( $\alpha$ -fucosidase) = positive, FA retest = positive<br>Blood and joint fluid culture positive for <i>S. pneumoniae</i> , CSF PCR positive for <i>S. pneumoniae</i> by LDT PCR | Infectious, CNS disease (Bacteremia, septic joint and ME with <i>S pneumoniae</i> ) | TP |
| 5 | <i>S. pneumoniae</i> | 18-34 yr, M | 4 | 9  | 204 | Xanthochromic | 2000 | 3968 | NOS | CRO, AZM, AMB, 5FC, FLC | 2 <sup>nd</sup> target PCR ( $\alpha$ -fucosidase) = positive, FA retest = positive                                                                                                                           | Infectious, non-CNS (Cryptococcal sepsis, HIV)                                      | TP |
| 6 | <i>S. pneumoniae</i> | 35-64 yr, M | 0 | 62 | 277 | Xanthochromic | 190  | 1450 | NOS | CRO, VAN, ACV           | 2 <sup>nd</sup> target PCR ( $\alpha$ -fucosidase) = positive, FA retest = positive                                                                                                                           | Unknown, not definitive (Heavy WBC, concern of falsely negative CSF culture)        | TP |

|    |                      |             |   |    |     |               |     |      |     |            |                                                                                     |                                                      |    |
|----|----------------------|-------------|---|----|-----|---------------|-----|------|-----|------------|-------------------------------------------------------------------------------------|------------------------------------------------------|----|
| 7  | <i>S. pneumoniae</i> | >65 yr, F   | 0 | 10 | 998 | Xanthochromic | 11  | 5740 | GPC | Broad Cvg. | 2 <sup>nd</sup> target PCR ( $\alpha$ -fucosidase) = positive, FA retest = positive | Infectious, non-CNS ( <i>S. pneumoniae</i> sepsis)   | TP |
| 8  | <i>S. pneumoniae</i> | >65 yr, M   | 0 | 10 | 858 | Xanthochromic | 386 | 2720 | GPC | none       | 2 <sup>nd</sup> target PCR ( $\alpha$ -fucosidase) = positive                       | Non-infectious, non-CNS (Broken arm, delirium)       | TP |
| 9  | <i>S. pneumoniae</i> | <2 mo, M    | 8 | 46 | 71  | Clear         | 560 | 3    | NOS | none       | 2 <sup>nd</sup> target PCR ( $\alpha$ -fucosidase) = negative, FA retest =negative  | Infectious, non-CNS ( <i>S. agalactiae</i> in urine) | FP |
| 10 | <i>S. pneumoniae</i> | <2 mo, M    | 0 | 65 | 5   | Clear         | 7   | 3    | NOS | none       | 2 <sup>nd</sup> target PCR ( $\alpha$ -fucosidase) = negative, FA retest =negative  | Infectious, non-CNS (Parainfluenza)                  | FP |
| 11 | <i>S. pneumoniae</i> | 2-17 yr, M  | 0 | 53 | 5   | Clear         | 0   | 0    | NOS | CRO        | 2 <sup>nd</sup> target PCR ( $\alpha$ -fucosidase) = negative, FA retest =negative  | Infectious, non-CNS (Folliculitis)                   | FP |
| 12 | <i>S. pneumoniae</i> | 18-34 yr, F | 0 | 56 | 49  | Clear         | 0   | 1    | NOS | none       | 2 <sup>nd</sup> target PCR ( $\alpha$ -fucosidase) = negative, FA retest =negative  | Non-infectious, CNS disease (Epilepsy)               | FP |
| 13 | <i>S. pneumoniae</i> | 18-34 yr, F | 0 | 58 | 19  | Clear         | 0   | 1    | NOS | none       | 2 <sup>nd</sup> target PCR ( $\alpha$ -fucosidase) = negative,                      | Infectious, non-CNS (Bell's                          | FP |

|    |                      |             |   |     |     |               |       |     |       |               |                                                                                                 |                                                               |    |
|----|----------------------|-------------|---|-----|-----|---------------|-------|-----|-------|---------------|-------------------------------------------------------------------------------------------------|---------------------------------------------------------------|----|
|    |                      |             |   |     |     |               |       |     |       |               | FA retest =negative                                                                             | palsy)                                                        |    |
| 14 | <i>S. pneumoniae</i> | 35-64 yr, M | 0 | 101 | 35  | Clear         | 0     | 1   | NOS   | SXT, FLC, ACV | 2 <sup>nd</sup> target PCR ( $\alpha$ -fucosidase) = negative, FA retest =negative              | Infectious, non-CNS (Hepatitis B, Multiple Myeloma)           | FP |
| 15 | <i>S. pneumoniae</i> | >65 yr, M   | 0 | 60  | 45  | Clear         | 186   | 2   | NOS   | none          | 2 <sup>nd</sup> target PCR ( $\alpha$ -fucosidase) = negative                                   | Unable to obtain                                              | FP |
| 16 | CMV                  | 2-17 yr, F  | 0 | 0   | 192 | Cloudy        | 255   | 615 | GPD C | none          | 2 <sup>nd</sup> target PCR (UL38) = positive<br>CSF positive for <i>S pneumoniae</i> by FA (TP) | Infectious, CNS disease (Bacterial ME, <i>S. pneumoniae</i> ) | TP |
| 17 | CMV                  | <2 mo, F    | 0 | 50  | 67  | Clear         | 0     | 2   | NOS   | none          | 2 <sup>nd</sup> target PCR (UL38) = negative                                                    | Unknown, not definitive (Febrile illness, pyelonephritis)     | FP |
| 18 | CMV                  | <2 mo, M    | 8 | 49  | 79  | Xanthochromic | 2480  | 9   | NOS   | ERY, ACV      | 2 <sup>nd</sup> target PCR (UL38) = negative                                                    | Non-infectious, non CNS (hyperbilirubinemia)                  | FP |
| 19 | EV                   | <2 mo, F    | 0 | 38  | 38  | Clear         | 3     | 2   | NOS   | none          | 2 <sup>nd</sup> target PCR (5'UTR) = positive                                                   | Infectious, non-CNS (sepsis, unspecified)                     | TP |
| 20 | EV                   | <2          | 0 | 52  | 166 | Bloody        | 21000 | 9   | NOS   | none          | 2 <sup>nd</sup> target PCR                                                                      | Unknown/n                                                     | TP |

|    |    |                |   |    |     |        |      |     |     |                          |                                                                                                           |                                                                                                                              |    |
|----|----|----------------|---|----|-----|--------|------|-----|-----|--------------------------|-----------------------------------------------------------------------------------------------------------|------------------------------------------------------------------------------------------------------------------------------|----|
|    |    | mo,<br>M       |   |    |     |        |      |     |     |                          | (5' UTR) =<br>positive<br>CSF also<br>positive for<br>HPeV by FA<br>(TP)                                  | ot<br>definitive<br>(Fever, at<br>risk for<br>sepsis, not<br>meningitis<br>due to<br>normal LP<br>and labs)                  |    |
| 21 | EV | <2<br>mo,<br>M | 0 | 43 | 639 | Bloody | 5730 | 149 | NOS | Broad<br>AM<br>and<br>AV | CSF positive<br>for<br>Enterovirus<br>by LDT PCR                                                          | Unknown/n<br>ot<br>definitive<br>(Neonate,<br>lethargic<br>and sleepy)                                                       | TP |
| 22 | EV | 2-23<br>mo, F  | 0 | 74 | 5   | Clear  | 0    | 3   | NOS | none                     | 2 <sup>nd</sup> target PCR<br>(5' UTR) =<br>positive,<br>CSF negative<br>for<br>Enterovirus by<br>LDT PCR | Infectious,<br>non-CNS<br>(Rhinovirus<br>/Enteroviru<br>s)                                                                   | TP |
| 23 | EV | 2-17<br>yr, F  | 0 | 58 | 50  | Clear  | 20   | 6   | NOS | none                     | 2 <sup>nd</sup> target PCR<br>(5' UTR) =<br>positive                                                      | Non-<br>infectious,<br>CNS<br>(Status-post<br>brain tumor<br>resection,<br>fever,<br>malaise,<br>and<br>nausea/vom<br>iting) | TP |
| 24 | EV | 2-17<br>yr, F  | 0 | 61 | 31  | Clear  | 2    | 1   | NOS | none                     | 2 <sup>nd</sup> target PCR<br>(5' UTR) =                                                                  | Unknown/n<br>ot                                                                                                              | FP |

|    |       |             |   |     |     |       |    |     |     |                 |                                                                                                              |                                                                                   |    |
|----|-------|-------------|---|-----|-----|-------|----|-----|-----|-----------------|--------------------------------------------------------------------------------------------------------------|-----------------------------------------------------------------------------------|----|
|    |       |             |   |     |     |       |    |     |     |                 | negative                                                                                                     | definitive (Convulsions, fever)                                                   |    |
| 25 | EV    | 18-34 yr, F | 3 | 54  | 110 | Clear | 19 | 136 | NOS | Broad AM and AV | 2 <sup>nd</sup> target PCR (5' UTR) = negative, CSF negative for Enterovirus by LDT PCR                      | Unknown/not definitive (Kidney Transplant, extremity weakness and facial droop)   | FP |
| 26 | HSV-1 | 2-23 mo, M  | 0 | 132 | 12  | Clear | 0  | 1   | NOS | CRO             | 2 <sup>nd</sup> target PCR (US7) = negative, Enhanced comparator = negative, CSF negative for HSV by LDT PCR | Non-infectious, CNS (Complex Febrile Seizures, Rhinovirus)                        | FP |
| 27 | HSV-1 | 2-23 mo, F  | 0 | 63  | 11  | Clear | 94 | 3   | NOS | CRO             | 2 <sup>nd</sup> target PCR (US7) = negative, CSF positive for HHV-6 by FA (TP)                               | Infectious, not definitive (Fever of unknown origin, neck pain, bulging fontanel) | FP |
| 28 | HSV-2 | 35-64 yr, M | 0 | 58  | 256 | Clear | 9  | 367 | NOS | CRO             | CSF positive for HSV by LDT PCR                                                                              | Infectious, CNS (Viral meningitis, HSV)                                           | TP |
| 29 | HSV-2 | 35-64 yr, F | 0 | 92  | 28  | Clear | 19 | 2   | NOS | none            | 2 <sup>nd</sup> target PCR (US2) =                                                                           | Unknown, not                                                                      | FP |



|    |       |             |   |    |    |       |      |     |     |      |                                                                                                      |                                                         |    |
|----|-------|-------------|---|----|----|-------|------|-----|-----|------|------------------------------------------------------------------------------------------------------|---------------------------------------------------------|----|
|    |       |             |   |    |    |       |      |     |     |      | negative                                                                                             | definitive                                              |    |
| 30 | HHV-6 | 18-34 yr, F | 2 | 66 | 35 | Clear | 1540 | 2   | NOS | none | 2 <sup>nd</sup> target PCR (pol) = positive                                                          | Non-infectious, non-CNS (Acute myeloblastic leukemia)   | TP |
| 31 | HHV-6 | 2-23 mo, M  | 0 | 59 | 22 | Clear | 2    | 79  | NOS | none | 2 <sup>nd</sup> target PCR (pol) = negative                                                          | Unknown, not definitive (Fever)                         | FP |
| 32 | HHV-6 | 2-17 yr, M  | 0 | 57 | 56 | Clear | 16   | 79  | NOS | none | 2 <sup>nd</sup> target PCR (pol) = negative                                                          | Non-infectious, CNS disease (Transverse myelitis)       | FP |
| 33 | HHV-6 | 2-17 yr, M  | 0 | 53 | 42 | Clear | 9    | 134 | NOS | none | 2 <sup>nd</sup> target PCR (pol) = negative                                                          | Infectious, CNS disease (Viral/aseptic ME, unspecified) | FP |
| 34 | HPeV  | <2 mo, M    | 8 | 49 | 42 | Clear | 0    | 2   | NOS | none | 2 <sup>nd</sup> target PCR (5'UTR) = negative<br>CSF negative and Blood positive for HPeV by LDT PCR | Infectious, non-CNS (HPeV in blood)                     | TP |
| 35 | HPeV  | <2 mo, F    | 0 | 55 | 45 | Clear | 10   | 7   | NOS | GEN  | 2 <sup>nd</sup> target PCR (5'UTR) = negative                                                        | Infectious, non-CNS (HPeV in                            | TP |

|    |                             |             |   |    |     |               |      |      |       |                         |                                                                                |                                                |    |
|----|-----------------------------|-------------|---|----|-----|---------------|------|------|-------|-------------------------|--------------------------------------------------------------------------------|------------------------------------------------|----|
|    |                             |             |   |    |     |               |      |      |       |                         | CSF negative and Blood/throat positive for HPeV by LDT PCR                     | blood)                                         |    |
| 36 | HPeV                        | <2 mo, F    | 8 | 40 | 44  | Clear         | 2    | 14   | NOS   | none                    | 2 <sup>nd</sup> target PCR (5'UTR) = negative CSF positive for HPeV by LDT PCR | Infectious, CNS (Viral/aseptic ME, HPeV)       | TP |
| 37 | VZV                         | 35-64 yr, F | 0 | 64 | 58  | Clear         | 2    | 422  | NOS   | ACV                     | 2 <sup>nd</sup> target PCR (ORF17) = negative CSF negative for VZV by LDT      | Infectious, non-CNS (Herpes zoster oticus)     | TP |
| 38 | VZV                         | >65 yr, F   | 0 | 51 | 62  | Clear         | 74   | 20   | NOS   | none                    | 2 <sup>nd</sup> target PCR (ORF17) = negative Serum positive for HSV IgM       | Infectious, non-CNS (VZV/Herpes zoster)        | TP |
| 39 | VZV                         | 18-34 yr, M | 4 | 9  | 204 | Xanthochromic | 2000 | 3968 | NOS   | CRO, AZM, AMB, 5FC, FLC | 2 <sup>nd</sup> target PCR (ORF17) = negative                                  | Infectious, non-CNS (cryptococcal sepsis, HIV) | FP |
| 40 | <i>C. neoformans/gattii</i> | 35-64 yr, M | 0 | 27 | 90  | Clear         | 21   | 18   | Yeast | none                    | CSF positive for Cryptococcal Ag Repeat comparator <sup>e</sup> =              | Infectious, CNS (Fungal/cryptococcal ME)       | TP |

|    |                             |             |   |     |     |       |   |    |     |             |                                                                         |                                                                                            |    |
|----|-----------------------------|-------------|---|-----|-----|-------|---|----|-----|-------------|-------------------------------------------------------------------------|--------------------------------------------------------------------------------------------|----|
|    |                             |             |   |     |     |       |   |    |     |             | negative                                                                |                                                                                            |    |
| 41 | <i>C. neoformans/gattii</i> | 35-64 yr, M | 4 | 11  | 162 | Clear | 1 | 37 | NOS | HAAR T, VRC | CSF positive for Cryptococcal Ag                                        | Infectious, CNS (Fungal/cryptococcal ME)                                                   | TP |
| 42 | <i>C. neoformans/gattii</i> | <2 mo, F    | 8 | 110 | 62  | Clear | 1 | 7  | NOS | none        | CSF negative for Cryptococcal Ag                                        | Infectious, non-CNS ( <i>E. coli</i> UTI, rhinovirus NPS)                                  | FP |
| 43 | <i>C. neoformans/gattii</i> | 16-34 yr, M | 0 | 62  | 56  | Clear | 0 | 1  | NOS | none        | CSF negative for Cryptococcal Ag                                        | Unknown/n of definitive (EBV serology high)                                                | FP |
|    | <i>False Negative</i>       |             |   |     |     |       |   |    |     |             |                                                                         |                                                                                            |    |
| 44 | <i>S. agalactiae</i>        | +65 yr, M   | 0 | 81  | 32  | Clear | 8 | 1  | NOS | none        | 2 <sup>nd</sup> target PCR (cfb) = negative<br>FA retest = negative     | Infectious, CNS disease (Soft tissue infection with Gp B Strep. related to spinal implant) | FN |
| 45 | EV                          | <2 mo, F    | 0 | 51  | 50  | Clear | 1 | 9  | NOS | none        | 2 <sup>nd</sup> target PCR (5' UTR) = positive,<br>FA retest = positive | Infectious, non-CNS (Enterovirus hand-foot-mouth disease)                                  | FN |

|    |       |            |   |    |    |       |      |     |     |          |                                                                            |                                                         |    |
|----|-------|------------|---|----|----|-------|------|-----|-----|----------|----------------------------------------------------------------------------|---------------------------------------------------------|----|
| 46 | EV    | 2-23 mo, M | 0 | 58 | 32 | Clear | 0    | 3   | NOS | none     | FA retest = negative, CSF positive for Enterovirus by LDT PCR              | Infectious, CNS (Enterovirus ME)                        | FN |
| 47 | HHV-6 | 2-23 mo, F | 0 | 50 | 27 | Clear | 1300 | 2   | NOS | CRO, ACV | 2 <sup>nd</sup> target PCR (pol) = negative                                | Infectious, non-CNS ( <i>E. coli</i> UTI)               | FN |
| 48 | HHV-6 | 2-17 yr, M | 0 | 46 | 93 | Clear | 2    | 255 | NOS | none     | Comparator retest = positive CSF positive for EV by FA (TP)                | Infectious, CNS disease (Viral/aseptic ME, unspecified) | FN |
| 49 | HHV-6 | <2 mo, M   | 0 | 52 | 96 | Clear | 254  | 324 | NOS | none     | 2 <sup>nd</sup> target PCR (pol) = negative CSF positive for EV by FA (TP) | Infectious, CNS disease (Viral/aseptic ME, unspecified) | TN |

<sup>a</sup> Additional analyses may have included a 2<sup>nd</sup> commercially available PCR assay performed at BioFire (target gene), repeat testing with FA or comparator testing, or results of testing done at trial sites as standard of care. Investigational testing was limited by specimen volumes.

<sup>b</sup> Antimicrobial or other chemotherapeutics (antivirals) given within 24 hours prior to collection of CSF by spinal tap.

<sup>c</sup> Information collected for discrepancy investigation from additional review of the medical record by each trial site to determine the final clinical diagnosis.

<sup>d</sup> Final resolution determined as agreement with 2 of 3 results: 1) FA testing, 2) comparator testing, and 3) composite findings from Gram stain, additional analysis/supplemental testing, and final clinical diagnosis.

<sup>e</sup> Immune status was determined and categorized as follows according to 2013 Infectious Diseases Society of America Guidelines.<sup>13</sup>

0. Immunocompetent
1. Combined primary immunodeficiency disorder (e.g., severe combined immunodeficiency)
2. Receiving cancer chemotherapy
3. Within two months after solid organ transplantation or receiving augmented immunosuppression for rejection
4. With Human Immunodeficiency Virus (HIV) infection with a CD4 T-lymphocyte count  $<200$  cells/mm<sup>3</sup> for adults and adolescents and percentage  $<15$  for infants and children
5. Receiving daily corticosteroid therapy with a dose  $\geq 20$  mg (or  $>2$  mg/kg/day for patients who weigh  $<10$  kg) of prednisone or equivalent for  $\geq 14$  days
6. Receiving certain biologic immune modulators, that is, a tumor necrosis factor-alpha (TNF- $\alpha$ ) blocker or rituximab
7. Premature birth with a corrected gestational age  $<40$  weeks
8. Infants  $<30$  days who are full term

Abbreviations: 5 FC, 5-flucytosine; AAC, antimicrobial agents and chemotherapy; ACV, acyclovir; AM, antimicrobial; AMB, amphotericin B; AV, antiviral; AZM, azithromycin; Broad Cvg, broad coverage, not otherwise specified; CNS, central nervous system; CSF, cerebral spinal fluid; CRO, ceftriaxone; ERY, erythromycin; F, female; FLC, fluconazole; FP, false positive; GEN, gentamicin; GNDC, Gram negative diplococci; GPC, Gram positive cocci; GPDC, gram positive diplococci; HAART, highly active antiretroviral therapy; LDT, laboratory-developed test; LP, lumbar puncture; M, male; ME, meningitis/encephalitis; NOS, no organisms seen in smear; TZP, piperacillin/tazobactam; SXT, trimethoprim-sulfamethoxazole; TN, true negative; TP, true positive; UTI, urinary tract infection; VAN, vancomycin; WBC, white blood cells.

SUPPLEMENTAL TABLE S3 Additional Information for CSF Specimens with Concordant Results [FilmArray ME Panel (FA) and Comparator Methods

| Positive FilmArray ME Target | Demographic Information: |                            | CSF Parameters  |                       |                            |            | AAC given before LP <sup>b</sup> | Summary of Clinical Diagnosis for Medical Records (Final Diagnosis) <sup>c</sup>                                                                   |
|------------------------------|--------------------------|----------------------------|-----------------|-----------------------|----------------------------|------------|----------------------------------|----------------------------------------------------------------------------------------------------------------------------------------------------|
|                              | Age, Sex                 | Immune Status <sup>a</sup> | Glucose (mg/dL) | Protein Conc. (mg/dL) | WBC Count (cells/ $\mu$ L) | Gram Stain |                                  |                                                                                                                                                    |
| <i>E.coli</i> K1             | 35-64 yr, M              | 0                          | 60              | 70                    | 2000                       | GNR        | VAN, CAZ                         | Bacterial ME ( <i>E. coli</i> ); status post neurosurgery                                                                                          |
| <i>E.coli</i> K1             | 2-23 mo, F               | 0                          | 72              | 152                   | 11                         | NOS        | <i>none</i>                      | Bacterial ME ( <i>E. coli</i> and <i>S. viridans</i> ); E coli sepsis and meningitis, venous sinus thrombosis, R femoral DVT, seizures.            |
| <i>H. influenzae</i>         | 35-64 yr, F              | 9 <sup>a</sup>             | 42              | 109                   | 1485                       | NOS        | <i>none</i>                      | Bacterial ME ( <i>H. influenzae</i> ); Haemophilus meningitis                                                                                      |
| <i>S. pneumoniae</i>         | 35-64 yr, M              | 0                          | 2               | 468                   | 7250                       | NOS        | VAN, CAZ                         | Bacterial ME ( <i>S. pneumoniae</i> ); <i>S. pneumoniae</i> sepsis and meningitis                                                                  |
| <i>S. pneumoniae</i>         | 2-17 yr, F               | 0                          | 0               | 192                   | 615                        | GPDC       | <i>none</i>                      | Bacterial ME ( <i>S. pneumoniae</i> ); <i>S. pneumoniae</i> meningitis                                                                             |
| <i>S. pneumoniae</i>         | 2-23 mo, M               | 0                          | 84              | 136                   | 528                        | GPDC       | VAN, CRO, ACV                    | Bacterial ME ( <i>S. pneumoniae</i> ); <i>S. pneumoniae</i> meningitis, complex febrile seizure, pos for <i>S. pneumoniae</i> and Rhino/EV from NP |

SUPPLEMENTAL TABLE S3 Additional Information for CSF Specimens with Concordant Results [FilmArray ME Panel (FA) and Comparator Methods

|                      |             |   |    |     |      |     |                         |                                                                                                                                                                      |
|----------------------|-------------|---|----|-----|------|-----|-------------------------|----------------------------------------------------------------------------------------------------------------------------------------------------------------------|
| <i>S. pneumoniae</i> | 35-64 yr, M | 2 | 48 | 298 | 1518 | GPC | Broad CVG               | Infectious, non-CNS; advanced oropharyngeal squamous cell carcinoma. Presenting with pneumonia, sepsis and altered mental status.<br>(pneumonia, unspecified sepsis) |
| CMV                  | 18-34 yr, M | 4 | 52 | 28  | 2    | NOS | TZP, SXT, AZM, GCV, FOS | Viral/aseptic ME (CMV); HIV/AIDs with a CD4 of <20. CNS lymphoma, CMV encephalitis, and being treated empirically for possibility of CNS toxoplasmosis.              |
| CMV                  | <2 mo, F    | 0 | 62 | 115 | 5    | NOS | <i>none</i>             | Unknown/not definitive; fever                                                                                                                                        |
| CMV                  | <2 mo, F    | 1 | 25 | 86  | 73   | NOS | FEP, ACV, FLC           | Infectious, non-CNS (CMV); jaundice and hyperbilirubinemia. CMV pos                                                                                                  |
| EV                   | 2-17 yr, M  | 0 | 46 | 93  | 255  | NOS | <i>none</i>             | Viral/aseptic ME (unspecified); viral meningitis                                                                                                                     |
| EV                   | <2 mo, M    | 8 | 33 | 71  | 163  | NOS | <i>none</i>             | Viral/aseptic ME (EV); enterovirus meningitis                                                                                                                        |
| EV                   | 2-23 mo, M  | 0 | 48 | 130 | 47   | NOS | <i>none</i>             | Viral/aseptic ME (EV); Enterovirus meningoencephalitis and viremia                                                                                                   |
| EV                   | <2 mo, F    | 8 | 44 | 79  | 23   | NOS | <i>none</i>             | Viral/aseptic ME (EV); Enterovirus meningitis                                                                                                                        |
| EV                   | 2-17 yr, M  | 0 | 69 | 24  | 2    | NOS | <i>none</i>             | Non-infectious, CNS disease; Migraine                                                                                                                                |
| EV                   | 2-17 yr, F  | 0 | 50 | 27  | 79   | NOS | <i>none</i>             | Viral/aseptic ME (EV); Enterovirus meningitis                                                                                                                        |

SUPPLEMENTAL TABLE S3 Additional Information for CSF Specimens with Concordant Results [FilmArray ME Panel (FA) and Comparator Methods

|    |            |   |    |     |     |     |             |                                                                                                                                                            |
|----|------------|---|----|-----|-----|-----|-------------|------------------------------------------------------------------------------------------------------------------------------------------------------------|
| EV | <2 mo, M   | 8 | 22 | 185 | 4   | NOS | <i>none</i> | Viral/aseptic ME (EV); Enterovirus meningitis                                                                                                              |
| EV | <2 mo, M   | 0 | 49 | 24  | 1   | NOS | <i>none</i> | Unknown/not definitive; Fever of the newborn                                                                                                               |
| EV | <2 mo, M   | 8 | 43 | 95  | 1   | NOS | AMP, GEN    | Viral/aseptic ME (EV); meconium aspiration/pneumonia, sepsis, enterovirus meningitis                                                                       |
| EV | <2 mo, F   | 8 | 40 | 43  | 77  | NOS | AMP, ACV    | Viral/aseptic ME (EV); enterovirus meningitis (fever, macular rash, EV pos in CSF, blood and swab.)                                                        |
| EV | <2 mo, F   | 8 | 35 | 80  | 550 | NOS | <i>none</i> | Viral/aseptic ME (EV); Enterovirus aseptic meningitis (Present with fever, poor PO intake, aseptic meningitis. EV pos in CSF, blood, and pooled specimens) |
| EV | <2 mo, F   | 0 | 36 | 50  | 82  | NOS | <i>none</i> | Viral/aseptic ME (EV); Enterovirus Infectious (Fever, EV pos in CSF and blood, EV/Rhino pos respiratory specimen)                                          |
| EV | <2 mo, F   | 0 | 41 | 39  | 325 | NOS | <i>none</i> | Viral/aseptic ME (EV); Neonatal sepsis (Fever, EV pos CSF and pooled specimen, pos EV/Rhinovirus respiratory specimen)                                     |
| EV | 2-17 yr, M | 0 | 47 | 84  | 715 | NOS | <i>none</i> | Viral/aseptic ME (EV); Enterovirus meningitis (Present fever, rash, myalgia, EV pos in CSF)                                                                |



SUPPLEMENTAL TABLE S3 Additional Information for CSF Specimens with Concordant Results [FilmArray ME Panel (FA) and Comparator Methods

|    |          |   |    |     |      |     |               |                                                                                                                                                         |
|----|----------|---|----|-----|------|-----|---------------|---------------------------------------------------------------------------------------------------------------------------------------------------------|
| EV | <2 mo, M | 0 | 36 | 96  | 299  | NOS | <i>none</i>   | Viral/aseptic ME (EV); Enterovirus meningitis (Present fever, EV pos CSF and pooled specimens)                                                          |
| EV | <2 mo, F | 8 | 60 | 52  | 0    | NOS | <i>none</i>   | Infectious, non-CNS (EV in blood); Fever secondary to viral infection (Fever, EV pos in blood and pooled specimen)                                      |
| EV | <2 mo, M | 8 | 40 | 74  | 5    | NOS | <i>none</i>   | Viral/aseptic ME (EV); Fever secondary to viral infection (Fever, EV pos in blood and pooled specimen)                                                  |
| EV | <2 mo, F | 0 | 39 | 280 | 760  | NOS | AMP, GEN, ACV | Viral/aseptic ME (EV); Enterovirus meningitis, Cleft palate (developed tachypnea, pos for EV in CSF, some intraventricular hemorrhage, cerebral edema ) |
| EV | <2 mo, F | 8 | 57 | 50  | 29   | NOS | <i>none</i>   | Viral/aseptic ME (EV); Neonatal fever, Enterovirus, Anemia (Fever, EV positive in blood, CSF, pooled specimens, EV/RH pos respiratory specimen)         |
| EV | <2 mo, M | 0 | 62 | 110 | 25   | NOS | <i>none</i>   | Viral/aseptic ME (EV); Enterovirus meningitis (EV pos in blood & CSF)                                                                                   |
| EV | <2 mo, M | 8 | 42 | 130 | 1779 | NOS | <i>none</i>   | Viral/aseptic ME (EV); Aseptic meningitis (Fever, EV pos in CSF and blood. RH/EV pos in respiratory specimen)                                           |

SUPPLEMENTAL TABLE S3 Additional Information for CSF Specimens with Concordant Results [FilmArray ME Panel (FA) and Comparator Methods

|    |             |                |    |     |     |     |             |                                                                                                                                                |
|----|-------------|----------------|----|-----|-----|-----|-------------|------------------------------------------------------------------------------------------------------------------------------------------------|
| EV | <2 mo, M    | 0              | 52 | 525 | 70  | NOS | <i>none</i> | Viral/aseptic ME (EV); Fever in newborn, r/o sepsis (Fever, congestion, EV pos in CSF, blood & rectal. EV/RH pos in respiratory specimen)      |
| EV | <2 mo, M    | 0              | 39 | 212 | 226 | NOS | <i>none</i> | Infectious, non-CNS (enterovirus/rhinovirus); Fever, diarrhea, EV/RH pos in respiratory specimen, EV pos in pooled specimen                    |
| EV | 2-17 yr, M  | 0              | 58 | 43  | 28  | NOS | <i>none</i> | Viral/aseptic ME (EV); Enteroviral meningitis (EV pos in CSF)                                                                                  |
| EV | <2 mo, F    | 8              | 49 | 80  | 0   | NOS | <i>none</i> | Viral/aseptic ME (EV); fever in a neonate, Enterovirus infection (EV pos in CSF, blood and pooled specimen. EV/RH pos in respiratory specimen) |
| EV | <2 mo, M    | 0              | 48 | 19  | 4   | NOS | <i>none</i> | Viral/aseptic ME (EV); Enteroviral meningitis (EV pos CSF and blood)                                                                           |
| EV | <2 mo, F    | 0              | 43 | 83  | 594 | NOS | <i>none</i> | Viral/aseptic ME (EV); Fever in newborn, Enterovirus meningitis (EV pos CSF and blood)                                                         |
| EV | 18-34 yr, M | 0              | 69 | 48  | 142 | NOS | <i>none</i> | Viral/aseptic ME (EV); Aseptic meningitis, enterovirus (EV pos CSF)                                                                            |
| EV | <2 mo, M    | 0              | 36 | 160 | 410 | NOS | <i>none</i> | Viral/aseptic ME (EV)                                                                                                                          |
| EV | 2-17 yr, M  | 9 <sup>b</sup> | 95 | 89  | 943 | NOS | <i>none</i> | Viral/aseptic ME (EV)                                                                                                                          |

SUPPLEMENTAL TABLE S3 Additional Information for CSF Specimens with Concordant Results [FilmArray ME Panel (FA) and Comparator Methods

|    |             |                |    |    |     |     |               |                                                                                                 |
|----|-------------|----------------|----|----|-----|-----|---------------|-------------------------------------------------------------------------------------------------|
| EV | <2 mo, M    | 0              | 40 | 90 | 117 | NOS | <i>none</i>   | Viral/aseptic ME (EV)                                                                           |
| EV | 2-23 mo, M  | 0              | 43 | 33 | 1   | NOS | <i>none</i>   | Infectious, non-CNS (viral syndrome); Likely viral syndrome, sepsis ruled out                   |
| EV | 2-17 yr, M  | 0              | 52 | 10 | 34  | NOS | <i>none</i>   | Infectious, non-CNS (viral syndrome); Fever, viral syndrome, no signs of sepsis or meningitis   |
| EV | 2-17 yr, M  | 0              | 58 | 22 | 33  | NOS | <i>none</i>   | Viral/aseptic ME (EV)                                                                           |
| EV | 18-34 yr, F | 9 <sup>c</sup> | 58 | 46 | 46  | NOS | <i>none</i>   | Viral/aseptic ME (unspecified)                                                                  |
| EV | 18-34 yr, F | 9 <sup>d</sup> | 55 | 61 | 148 | NOS | VAN, CRO, ACV | Viral/aseptic ME (unspecified)                                                                  |
| EV | <2 mo, F    | 8              | 56 | 50 | 1   | NOS | Amp, CTX      | Infectious, non-CNS (rhinovirus); Upper respiratory infection – Rhino/Enterovirus               |
| EV | <2 mo, F    | 0              | 51 | 50 | 2   | NOS | amoxicillin   | Viral/aseptic ME (EV)                                                                           |
| EV | <2 mo, M    | 0              | 42 | 30 | 0   | NOS | <i>none</i>   | Unknown/not definitive; Fever, unspecified                                                      |
| EV | 2-23 mo, F  | 0              | 55 | 47 | 29  | NOS | <i>none</i>   | Viral/aseptic ME (unspecified); acute upper respiratory infection, unspecified viral meningitis |
| EV | 2-17 yr, M  | 0              | 53 | 27 | 16  | NOS | <i>none</i>   | Viral/aseptic ME (unspecified)                                                                  |
| EV | 2-23 mo, F  | 0              | 59 | 70 | 194 | NOS | <i>none</i>   | Viral/aseptic ME (unspecified)                                                                  |
| EV | <2 mo, F    | 8              | 47 | 42 | 2   | NOS | <i>none</i>   | Viral/aseptic ME (unspecified)                                                                  |
| EV | <2 mo, M    | 0              | 52 | 96 | 324 | NOS | <i>none</i>   | Viral/aseptic ME (unspecified)                                                                  |

SUPPLEMENTAL TABLE S3 Additional Information for CSF Specimens with Concordant Results [FilmArray ME Panel (FA) and Comparator Methods

|       |             |    |     |     |     |     |                 |                                                                                                                                                                  |
|-------|-------------|----|-----|-----|-----|-----|-----------------|------------------------------------------------------------------------------------------------------------------------------------------------------------------|
| HSV-1 | 35-64 yr, F | 0  | 68  | 130 | 137 | NOS | Broad AM and AV | Unspecified ME; Multiple, focal neurologic deficits, including uncontrolled seizure and probably meningitis                                                      |
| HSV-1 | 35-64 yr, M | 9° | 117 | 260 | 878 | NOS | CLI, ACV        | Viral/aseptic ME (HSV); Herpes encephalitis, hypoxic brain injury, chronic kidney disease, peripheral nerve disorder, congenital spherocytosis, Type II diabetes |
| HSV-2 | 35-64 yr, M | 4  | 49  | 690 | 240 | NOS | none            | Unknown/not definitive; HIV with CD4 >800 cells/mm <sup>3</sup>                                                                                                  |
| HSV-2 | 65+ yr, M   | 0  | 72  | 21  | 1   | NOS | VAN, DAP, TZP   | Infectious, non-CNS (unspecified sepsis); Sepsis secondary to prostatitis, negative blood cultures                                                               |
| HSV-2 | 35-64 yr, M | 0  | 72  | 56  | 218 | NOS | VAN, CRO, ACV   | <i>Unable to obtain</i>                                                                                                                                          |
| HSV-2 | 35-64 yr, F | 2  | 28  | 70  | 124 | NOS | <i>none</i>     | Non-infectious/non-CNS; squamous cell lymphoma, metastatic endometrial CA and Hep C presenting with headaches, vomiting and abdominal pain                       |

SUPPLEMENTAL TABLE S3 Additional Information for CSF Specimens with Concordant Results [FilmArray ME Panel (FA) and Comparator Methods

|       |             |                |     |     |     |     |                    |                                                                                                                                            |
|-------|-------------|----------------|-----|-----|-----|-----|--------------------|--------------------------------------------------------------------------------------------------------------------------------------------|
| HSV-2 | 65+ yr, F   | 0              | 53  | 109 | 540 | NOS | <i>none</i>        | Non-infectious/non-CNS; Hypertension, diabetes type 2, hypothyroidism, Hyperlipidemia, esophagitis, presents to the ED with headache       |
| HSV-2 | 35-64 yr, F | 0              | 67  | 109 | 300 | -   | <i>none</i>        | Unknown/not definitive; History of asthma; Migraines, and HTN. Presents with generalized body aches and constant headache for past 24 hrs. |
| HSV-2 | 35-64 yr, F | 9 <sup>†</sup> | 39  | 59  | 489 | NOS | AMP, VAN, CRO, ACV | Viral/aseptic ME (HSV)                                                                                                                     |
| HSV-2 | 35-64 yr, M | 0              | 73  | 64  | 312 | NOS | ACV                | Viral/aseptic ME (HSV); HSV meningoencephalitis based on HSV2 antibody in CSF                                                              |
| HSV-2 | 65+ yr, M   | 0              | 49  | 247 | 255 | NOS | VAN, CRO, ACV      | Viral/aseptic ME (HSV); recurrent HSV meningitis                                                                                           |
| HSV-2 | 18-34 yr, M | 0              | 50  | 109 | 13  | NOS | <i>none</i>        | Viral/aseptic ME (unspecified)                                                                                                             |
| HHV-6 | 18-34 yr, F | 2              | 39  | 64  | 0   | NOS | DAP, MEM, SXT, ACV | Unknown/not definitive; Acute lymphocytic leukemia                                                                                         |
| HHV-6 | <2 mo, M    | 8              | 47  | 150 | 32  | NOS | <i>none</i>        | Infectious, non-CNS ( <i>E. coli</i> UTI)                                                                                                  |
| HHV-6 | 2-23 mo, F  | 0              | 149 | 71  | 1   | NOS | <i>none</i>        | Non-infectious/CNS disease; Cardiac arrest resulting in severe hypoxic ischemic encephalopathy                                             |
| HHV-6 | <2 mo, F    | 8              | 0   | 0   | 0   | NOS | <i>none</i>        | Infectious, non-CNS (herpetic whitlow)                                                                                                     |

SUPPLEMENTAL TABLE S3 Additional Information for CSF Specimens with Concordant Results [FilmArray ME Panel (FA) and Comparator Methods

|       |             |   |    |     |    |     |               |                                                                                                                               |
|-------|-------------|---|----|-----|----|-----|---------------|-------------------------------------------------------------------------------------------------------------------------------|
| HHV-6 | <2 mo, F    | 0 | 47 | 64  | 11 | NOS | <i>none</i>   | Unknown/not definitive; Low-risk febrile illness                                                                              |
| HHV-6 | <2 mo, F    | 8 | 40 | 57  | 5  | NOS | <i>none</i>   | Infectious, non-CNS (herpetic whitlow)                                                                                        |
| HHV-6 | <2 mo, F    | 8 | 41 | 122 | 3  | NOS | AMP, CRO, ACV | Non-infectious/non-CNS; Severe mixed sleep apnea- acute life-threatening event                                                |
| HHV-6 | <2 mo, M    | 0 | 41 | 38  | 6  | GNR | <i>none</i>   | Bacterial ME (GNR meningitis)                                                                                                 |
| HHV-6 | 2-23 mo, F  | 0 | 81 | 30  | 1  | NOS | <i>none</i>   | Unknown/not definitive; Fever, dehydration                                                                                    |
| HHV-6 | <2 mo, M    | 0 | 49 | 44  | 2  | NOS | AMP, GEN      | Infectious, non-CNS (rhinovirus); Fever (Present with fever, cough, congestion, poor PO intake. Rhinovirus pos, loose stools) |
| HHV-6 | 2-23 mo, F  | 0 | 51 | 11  | 0  | NOS | AMX           | Infectious, non-CNS; Seizure-like activity, Acute Otitis Media, febrile, developed erythematous macular rash.                 |
| HHV-6 | 2-23 mo, F  | 0 | 63 | 11  | 3  | NOS | CRO           | Unknown/not definitive; Fever of Unknown origin ,Fever, neck pain, bulging fontanelle                                         |
| HHV-6 | 2-23 mo, F  | 0 | 62 | 15  | 4  | NOS | AMX           | Infectious, non-CNS (rhinovirus); Fever, cough, congestion, poor PO intake. Rhinovirus pos, loose stools                      |
| HHV-6 | 2-23 mo, M  | 7 | 38 | 184 | 8  | NOS | <i>none</i>   | Infectious, non-CNS (pneumonia, UTI)                                                                                          |
| HHV-6 | 18-34 yr, M | 0 | 63 | 15  | 1  | NOS | TZP, GCV      | Infectious, non-CNS (HHV-6)                                                                                                   |

SUPPLEMENTAL TABLE S3 Additional Information for CSF Specimens with Concordant Results [FilmArray ME Panel (FA) and Comparator Methods

|       |             |   |    |     |    |     |             |                                                                                                                                       |
|-------|-------------|---|----|-----|----|-----|-------------|---------------------------------------------------------------------------------------------------------------------------------------|
| HHV-6 | 35-64 yr, M | 0 | 37 | 157 | 42 | NOS | <i>none</i> | Infectious, CNS (MSSA pneumonia); Encephalopathy, unspecified, Pneumonia-MSSA                                                         |
| HHV-6 | <2 mo, F    | 0 | 59 | 41  | 4  | NOS | <i>none</i> | Infectious, non-CNS (unspecified bacteremia); fever                                                                                   |
| HHV-6 | <2 mo, F    | 0 | 60 | 24  | 2  | NOS | <i>none</i> | Viral/aseptic ME (unspecified)                                                                                                        |
| HPeV  | <2 mo, F    | 8 | 50 | 44  | 1  | NOS | <i>none</i> | Infectious, non-CNS (unspecified viral); fever                                                                                        |
| HPeV  | <2 mo, F    | 8 | 53 | 51  | 8  | NOS | <i>none</i> | Infectious, non-CNS (unspecified viral sepsis); Culture negative septic shock- likely viral                                           |
| HPeV  | <2 mo, F    | 8 | 55 | 33  | 1  | NOS | <i>none</i> | Unknown/not definitive; fever in infancy, heart murmur                                                                                |
| HPeV  | <2 mo, F    | 0 | 49 | 33  | 0  | NOS | <i>none</i> | Infectious, non-CNS (HPeV in blood)                                                                                                   |
| HPeV  | <2 mo, F    | 0 | 56 | 47  | 0  | NOS | <i>none</i> | Infectious, non-CNS (HPeV in blood, Rhino/EV NP)                                                                                      |
| HPeV  | <2 mo, M    | 8 | 49 | 73  | 20 | NOS | <i>none</i> | Viral/aseptic ME (HPeV); Rhino/Enterovirus respiratory illness (Parechovirus pos in CSF and blood, Rh/EV pos in respiratory specimen) |
| HPeV  | <2 mo, F    | 0 | 58 | 28  | 1  | NOS | <i>none</i> | Viral/aseptic ME (HPeV); Fever, parechovirus pos in CSF and blood                                                                     |
| HPeV  | <2 mo, M    | 0 | 55 | 33  | 8  | NOS | <i>none</i> | Viral/aseptic ME (HPeV); HPeV meningitis, Rh/EV respiratory illness<br>HPeV pos in CSF and blood, Rh/EV pos in respiratory specimen)  |

SUPPLEMENTAL TABLE S3 Additional Information for CSF Specimens with Concordant Results [FilmArray ME Panel (FA) and Comparator Methods

|              |             |   |    |     |     |     |             |                                                                                                  |
|--------------|-------------|---|----|-----|-----|-----|-------------|--------------------------------------------------------------------------------------------------|
| HPeV         | <2 mo, M    | 0 | 52 | 166 | 9   | NOS | <i>none</i> | Unknown/not definitive; Fever, at risk for sepsis. Not meningitis due to normal LP and labs.     |
| VZV          | 35-64 yr, F | 0 | 0  | 0   | 0   | NOS | <i>none</i> | Non-infectious/non-CNS; Fever, at risk for sepsis. Not meningitis due to normal LP and labs      |
| VZV          | 18-34 yr, M | 0 | 57 | 88  | 426 | NOS | Broad CVG   | Unknown/not definitive; 36 hours of headache, neck pain, nausea, vomiting and one week of a rash |
| VZV          | 35-64 yr, M | 2 | 36 | 116 | 62  | NOS | VAN, ACV    | Non-infectious/non-CNS; Diffuse Large B cell lymphoma                                            |
| VZV          | 18-34 yr, F | 0 | 55 | 83  | 300 | NOS | <i>none</i> | Viral/aseptic ME (VZV); presumed acute VZV encephalitis, VZV rash                                |
| Cryptococcus | 65+ yr, F   | 0 | 7  | 273 | 100 | NOS | CRO         | Fungal/cryptococcal ME; renal transplant with cryptococcal pulmonary and meningitis              |

<sup>a</sup>Immune Status: Immune status was determined and categorized as follows according to 2013 Infectious Diseases Society of America Guidelines.(13)

1. Combined primary immunodeficiency disorder (e.g., severe combined immunodeficiency)
2. Receiving cancer chemotherapy
3. Within two months after solid organ transplantation or receiving augmented immunosuppression for rejection
4. With Human Immunodeficiency Virus (HIV) infection with a CD4 T-lymphocyte count <200 cells/mm<sup>3</sup> for adults and adolescents and percentage <15 for infants and children
5. Receiving daily corticosteroid therapy with a dose  $\geq 20$  mg (or >2 mg/kg/day for patients who weigh <10 kg) of prednisone or equivalent for  $\geq 14$  days
6. Receiving certain biologic immune modulators, that is, a tumor necrosis factor-alpha (TNF- $\alpha$ ) blocker or rituximab
7. Premature birth with a corrected gestational age <40 weeks
8. Infants <30 days who are full term
9. Other (with description)

<sup>b</sup>Antimicrobial or other chemotherapeutics (antivirals) given within 24 hours prior to collection of CSF by spinal tap



## SUPPLEMENTAL TABLE S3 Additional Information for CSF Specimens with Concordant Results [FilmArray ME Panel (FA) and Comparator Methods

<sup>c</sup>Information collected for final diagnosis by each trial site.

Abbreviations: AAC, antimicrobial agents and chemotherapy; ACV, acyclovir; AM, antimicrobial; AMP, ampicillin; AMX, amoxicillin; AV, antiviral ; AZM, azithromycin; Broad Cvg, broad coverage, not otherwise specified; CAZ, ceftazidime; CLI, clindamycin; CNS, central nervous system; CSF, cerebral spinal fluid; CRO, ceftriaxone; CTX, cefotaxime; DAP, daptomycin; DOX, doxycycline; F, female; FOS, foscarnet; FEP, cefipime; FLC, fluconazole; FP, false positive; GEN, gentamicin; GCV, ganciclovir; GPC, Gram positive cocci; GPDC, gram positive diplococci; LP, lumbar puncture; M, male; ME, meningitis/encephalitis; MEM, meropenem; NOS, no organisms seen in smear; TZP, piperacillin/tazobactam; pos, positive; SXT, trimethoprim–sulfamethoxazole; UTI, urinary tract infection; VAN, vancomycin; WBC, white blood cells.
